# Supplementary material
Source: PubMed Central journal article supplement (PMC5182101)
Supplement: NIHMS825262-supplement-01.pdf [file NIHMS825262-supplement-01.pdf]

**Supplementary Table 1. Univariate analysis for relapse, OS and CRFS**

| Patient and Graft Characteristics     | Relapse       |         | OS            |         | CRFS          |         |
|---------------------------------------|---------------|---------|---------------|---------|---------------|---------|
|                                       | HR (95%CI)    | P value | HR (95%CI)    | P value | HR (95%CI)    | P value |
| <b>Sex</b>                            |               | 0.11    |               |         |               |         |
| Male                                  | Ref.          |         | Ref.          | 0.63    | Ref.          | 1.00    |
| Female                                | 0.7 (0.4-1.1) |         | 1.1 (0.8-1.5) |         | 1 (0.7-1.4)   |         |
| <b>D/R gender combination</b>         |               |         |               |         |               |         |
| Female to Male                        | Ref.          | 0.85    | Ref.          | 0.14    | Ref.          | 0.15    |
| Other                                 | 1.1 (0.6-1.9) |         | 1.4 (0.9-2.2) |         | 1.4 (0.9-2.1) |         |
| <b>Age (years)</b>                    |               |         |               |         |               |         |
| < 40 (n = )                           | Ref.          | 0.87    | Ref.          | 0.09    | Ref.          | 0.16    |
| ≥40 (n = )                            | 1 (0.5-1.7)   |         | 1.5 (0.9-2.4) |         | 1.4 (0.9-2.1) |         |
| <b>Donor</b>                          |               |         |               |         |               |         |
| Related donor                         | Ref.          | 0.37    | Ref.          | 0.33    | Ref.          | 0.32    |
| Non-related donor                     | 0.8 (0.5-1.3) |         | 1.2 (0.9-1.6) |         | 1.2 (0.9-1.6) |         |
| <b>HLA compatibility</b>              |               |         |               |         |               |         |
| Identical                             | Ref.          | 0.39    | Ref.          | 0.24    | Ref.          | 0.34    |
| Non-identical                         | 0.8 (0.5-1.4) |         | 1.2 (0.9-1.7) |         | 1.2 (0.8-1.6) |         |
| <b>Diagnosis</b>                      |               |         |               |         |               |         |
| Acute myeloid leukemia                | Ref.          | 0.19    | Ref.          | 0.96    | Ref.          | 0.68    |
| Myelodysplastic syndrome              | 0.7 (0.4-1.2) |         | 1 (0.7-1.4)   |         | 0.9 (0.7-1.3) |         |
| <b>Transplant year</b>                |               |         |               |         |               |         |
|                                       | Ref.          | 0.03    | Ref.          | 0.85    | Ref.          | 0.92    |
|                                       | 1.1 (1-1.2)   |         | 1 (1-1.1)     |         | 1.0 (1-1.1)   |         |
| <b>HCT-CI</b>                         |               |         |               |         |               |         |
| 0                                     | Ref.          | 0.26    | Ref.          | < 0.001 | Ref.          | 0.001   |
| 1-2                                   | 0.6 (0.3-1.2) |         | 1 (0.6-1.6)   |         | 0.8 (0.5-1.3) |         |
| ≥3                                    | 1 (0.6-1.6)   |         | 1.9 (1.3-2.9) |         | 1.5 (1-2.3)   |         |
| <b>HCT-CI/age</b>                     |               |         |               |         |               |         |
| 0                                     | Ref.          | 0.90    | Ref.          | < 0.001 | Ref.          | 0.001   |
| 1-2                                   | 1 (0.3-2.8)   |         | 2.1 (0.6-6.6) |         | 1.1 (0.5-2.5) |         |
| 3-4                                   | 0.9 (0.3-2.7) |         | 3.2 (1-10.1)  |         | 1.6 (0.7-3.6) |         |
| ≥5                                    | 1.2 (0.4-3.4) |         | 5 (1.6-16.1)  |         | 2.3 (1-5.2)   |         |
| <b>Conditioning regimen</b>           |               |         |               |         |               |         |
| TBI based                             | Ref.          | 0.56    | Ref.          | 0.20    | Ref.          | 0.23    |
| Chemo based                           | 0.9 (0.5-1.4) |         | 1.3 (0.9-1.8) |         | 1.2 (0.9-1.7) |         |
| <b>CD34+ x 10<sup>6</sup>/kg dose</b> |               |         |               |         |               |         |
| < 7.6x10 <sup>6</sup> /kg             | Ref.          | 0.84    | Ref.          | 0.60    | Ref.          | 0.52    |
| ≥ 7.6x10 <sup>6</sup> /kg             | 1.2 (0.7-1.8) |         | 0.9 (0.7-1.3) |         | 0.9 (0.7-1.3) |         |

| <b>CD34+ selection method</b> |               |      |             |      |             |      |
|-------------------------------|---------------|------|-------------|------|-------------|------|
| Clinimacs ®                   | Ref.          | 0.10 | Ref.        | 0.90 | Ref.        | 0.80 |
| OTHER                         | 0.7 (0.4-1.1) |      | 1 (0.7-1.4) |      | 1 (0.7-1.3) |      |

Abbreviations: NRM, non-relapse mortality; OS, overall survival, CRFS Chronic GVHD-Free, Relapse-Free Survival; D/R, donor/recipient; HCT-CI, Hematopoietic Cell Transplantation Comorbidity Index.
